# Supplementary material for: Defining the Cell Wall, Cell Cycle and Chromatin Landmarks in the Responses of Brachypodium distachyon to Salinity
Source: PubMed Central journal article supplement (PMC7835837; doi:10.3390/ijms22020949), 2021-01-19
Supplement: ijms-22-00949-s001.pdf [file ijms-22-00949-s001.pdf]

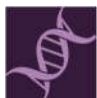

## Supplementary Materials

**Article Title:** Defining the Cell Wall, Cell Cycle and Chromatin Landmarks in the Responses of *Brachypodium Distachyon* to Salinity

**Authors:** Elzbieta Wolny, Aleksandra Skalska, Agnieszka Braszewska-Zalewska, Luis A. J. Mur and Robert Hasterok

The following Supplementary Materials are available for this article:

### Supplementary Figure

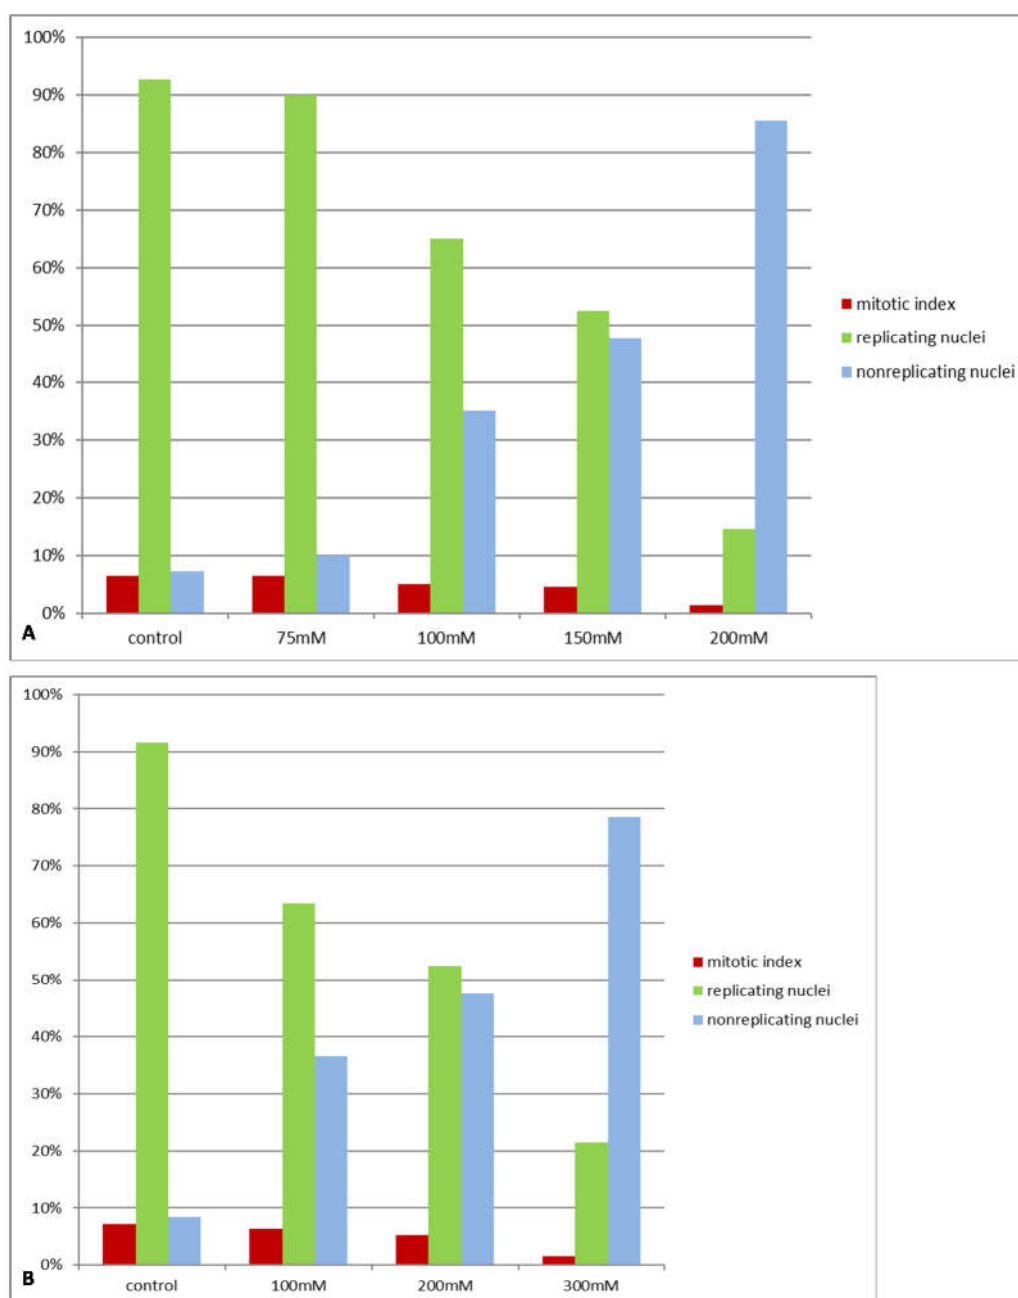

**Figure S1.** The mitotic activity of the root cells in the *Brachypodium* seedlings that had been “salt-stressed” (A) and “salt-shocked” (B) with various concentrations of NaCl and the frequency of nuclei with replicated DNA in the root meristematic cells.
